# Supplementary material
Source: PubMed Central journal article supplement (PMC4461543)
Supplement: NIHMS679368-supplement.pdf [file NIHMS679368-supplement.pdf]

# Supporting Material Information

---

## Effect of chirality on cellular uptake, imaging and photodynamic therapy of photosensitizers derived from chlorophyll-a

Avinash Srivatsan<sup>1</sup>, Paula Pera<sup>2</sup> Penny Joshi<sup>2</sup>, Yanfang Wang<sup>2</sup>, Joseph R. Missert<sup>2</sup>, Erin C. Tracy<sup>3</sup>, Walter A. Tabaczynski<sup>4</sup>, Rutao Yao<sup>5</sup>, Munawwar Sajjad<sup>5</sup>  
Heinz Baumann<sup>3</sup> and Ravindra K. Pandey<sup>1,2</sup>

<sup>1</sup>Department of Pharmacology, <sup>2</sup>Photodynamic Therapy Center, Cell Stress Biology, <sup>3</sup>Department of Molecular Biology, <sup>4</sup>NMR Facility, Roswell Park Cancer Institute, Buffalo, NY 14263 and <sup>5</sup>Department of Nuclear Medicine, SUNY, Buffalo, NY 14226

---

### Contents:

- S2. <sup>1</sup>H NMR spectrum of compound 3
- S3. <sup>1</sup>H NMR spectrum of compound 4
- S4. <sup>1</sup>H NMR spectrum of compound 5
- S5. <sup>1</sup>H NMR spectrum of compound 6
- S6. <sup>1</sup>H NMR spectrum of compound 7
- S7. <sup>1</sup>H NMR spectrum of compound 8
- S8. <sup>1</sup>H NMR spectrum of compound 9
- S9. <sup>1</sup>H NMR spectrum of compound 9a
- S10. <sup>1</sup>H NMR spectrum of compound 10
- S11. <sup>1</sup>H NMR spectrum of compound 11
- S12. <sup>13</sup>C NMR spectrum of compound 3
- S13. <sup>13</sup>C NMR spectrum of compound 4
- S14. <sup>13</sup>C NMR spectrum of compound 6
- S15. <sup>13</sup>C NMR spectrum of compound 9
- S16. <sup>13</sup>C NMR spectrum of compound 10
- S17. <sup>13</sup>C NMR spectrum of compound 11
- S18. <sup>1</sup>H sub-spectra of compounds 2, 3, 4, and 9
- S19. In vitro photosensitizing efficacy of compounds 2, 3 & 4

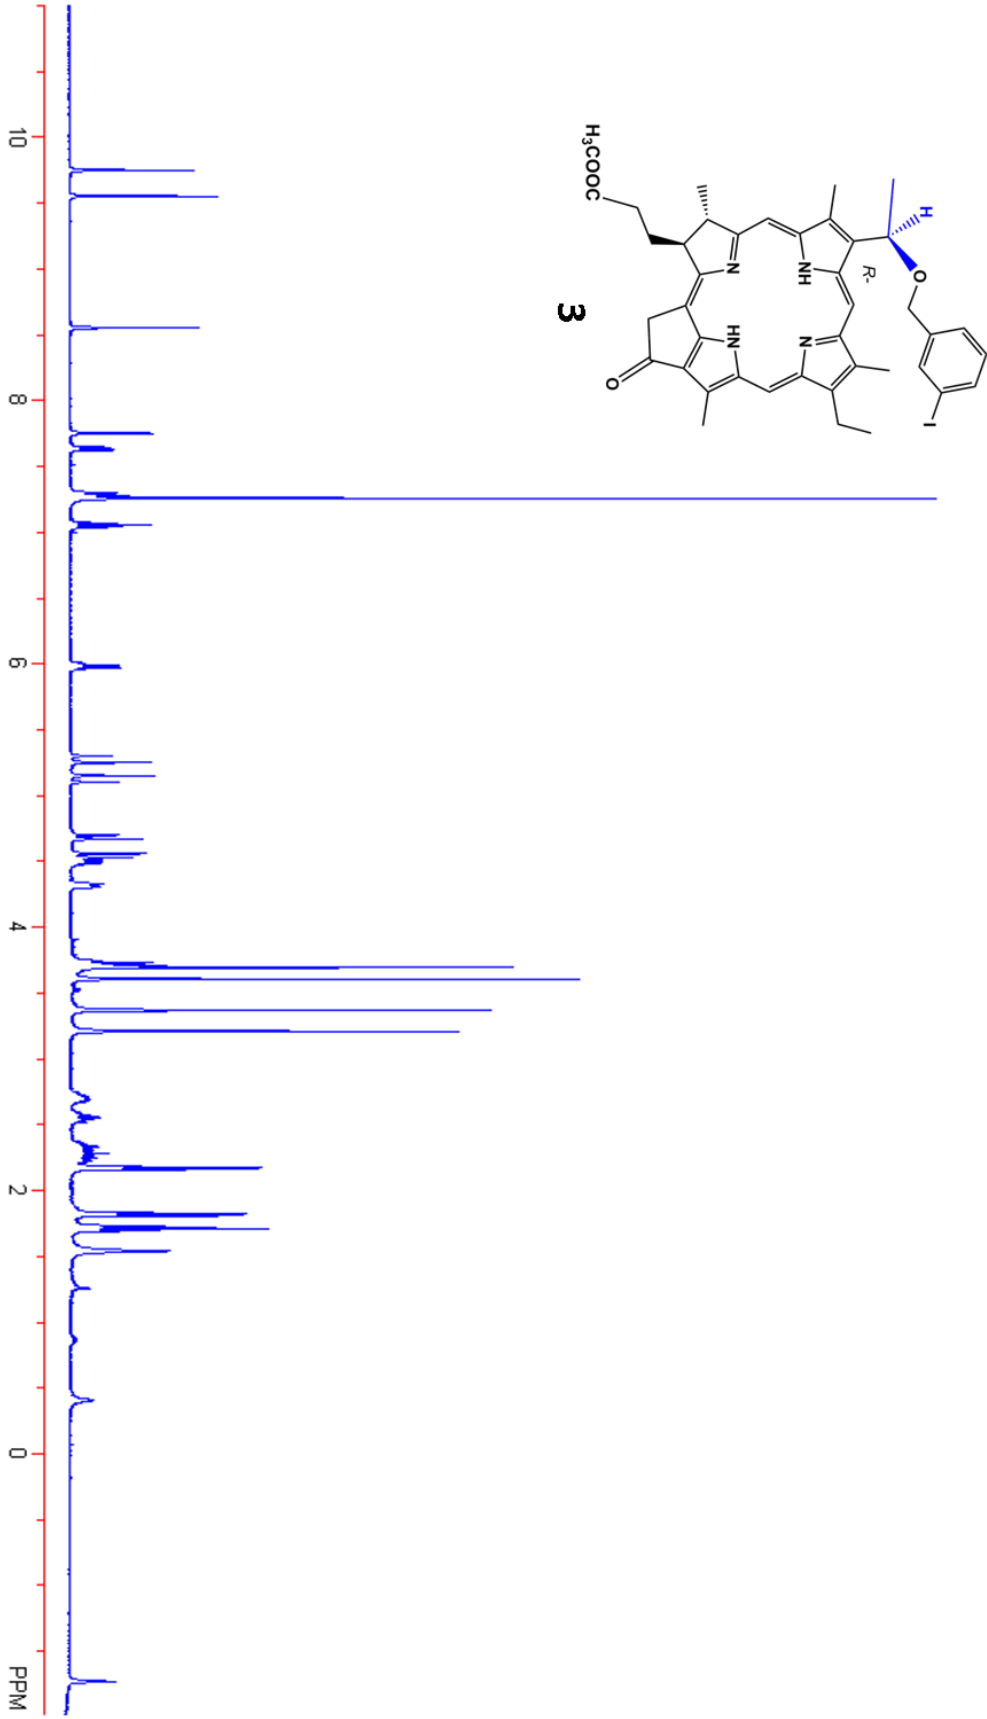

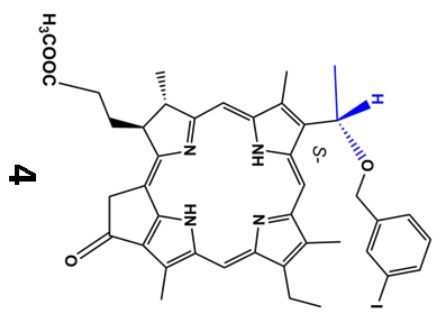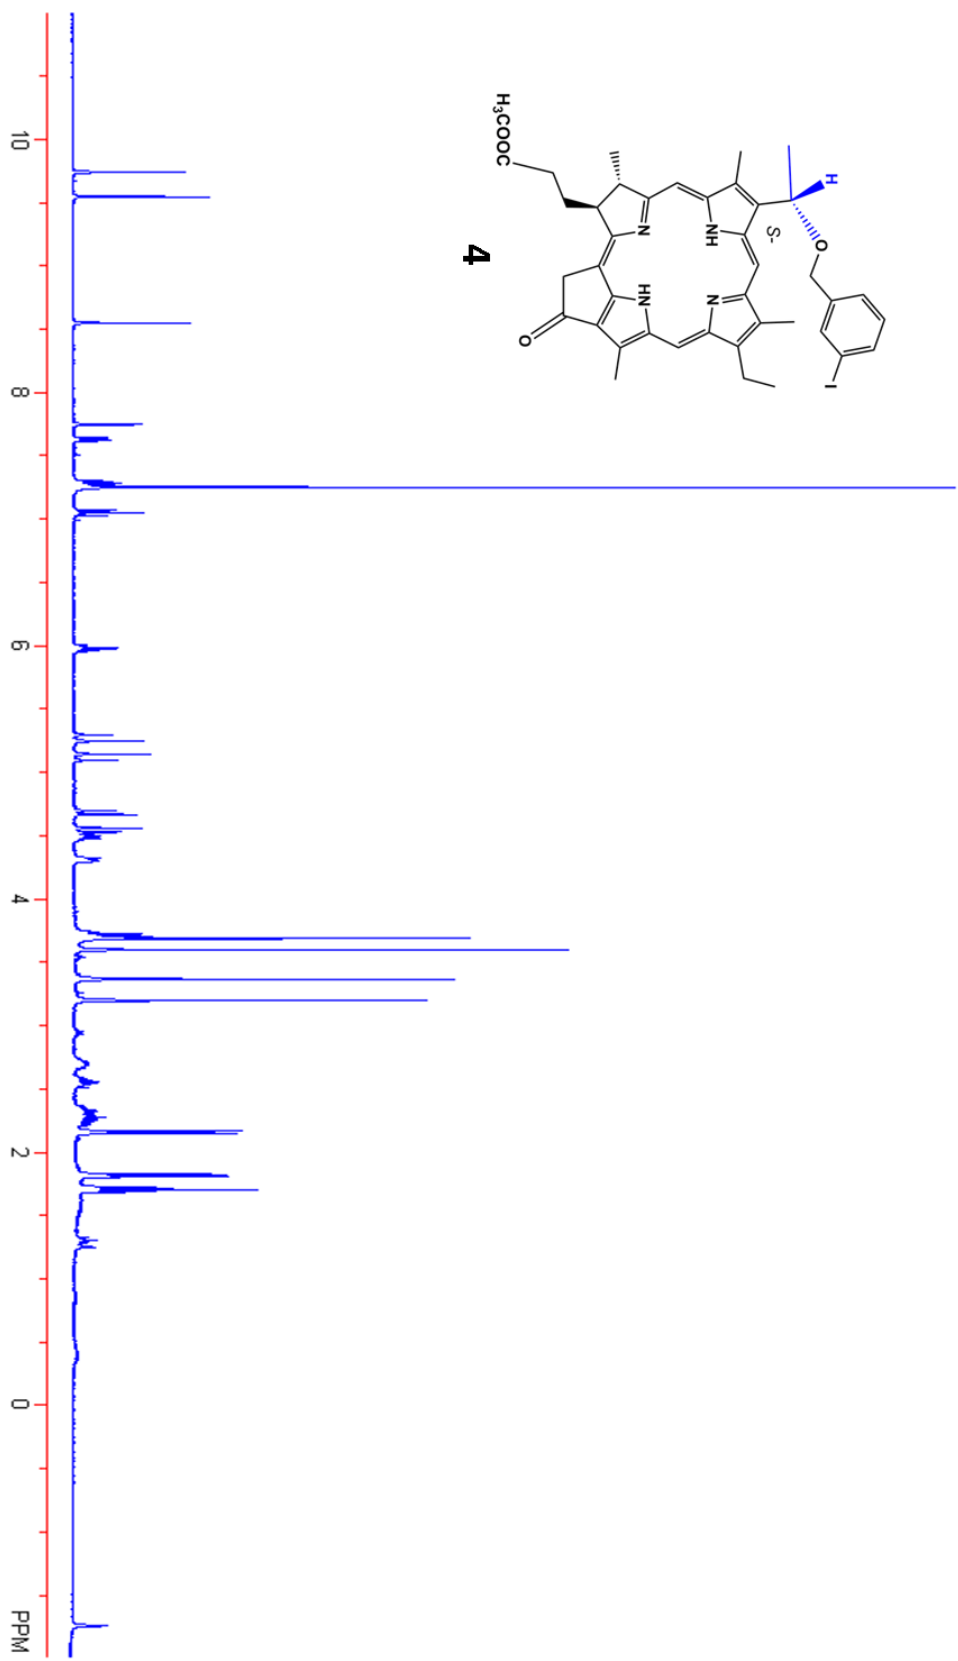

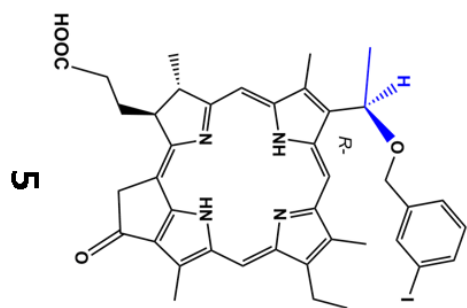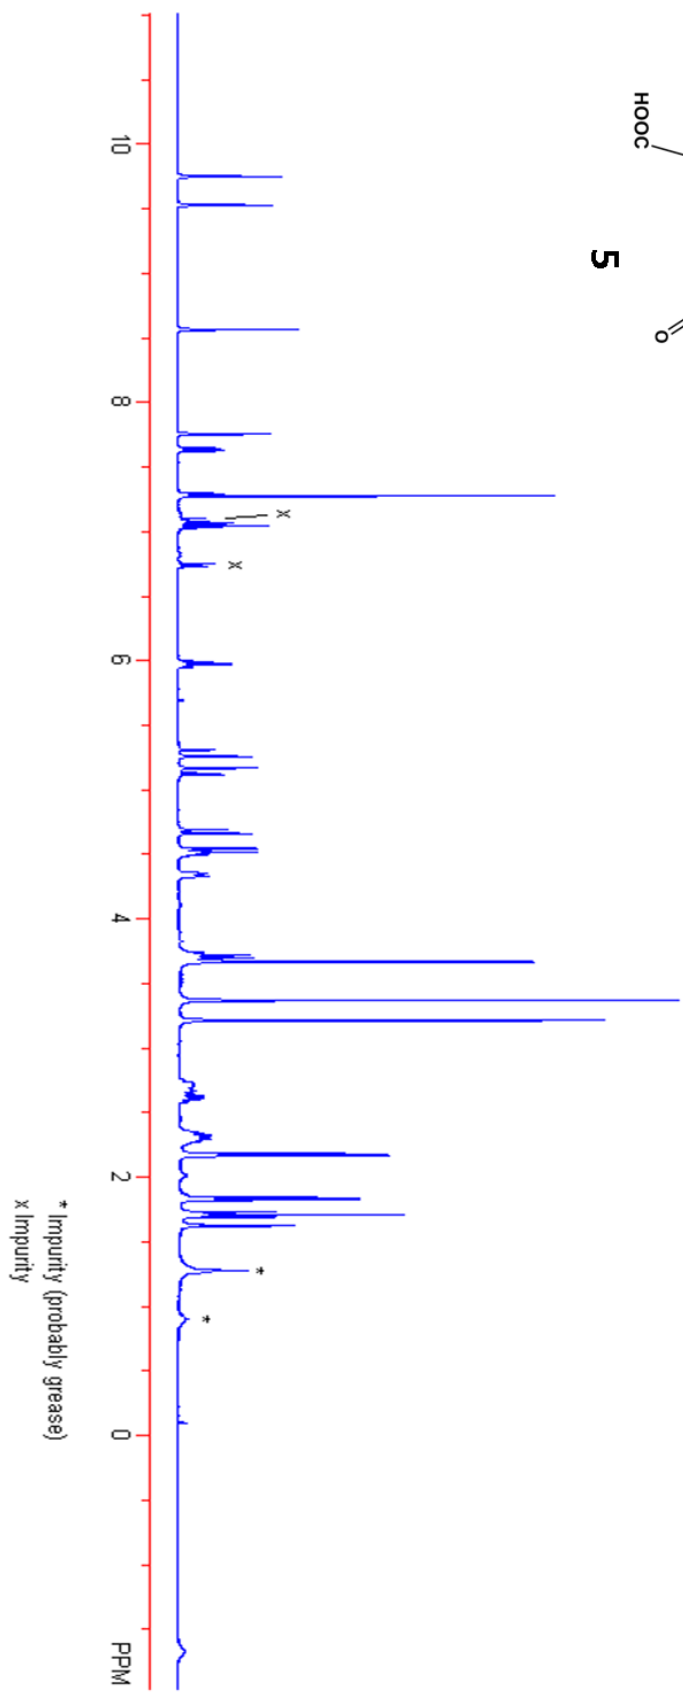

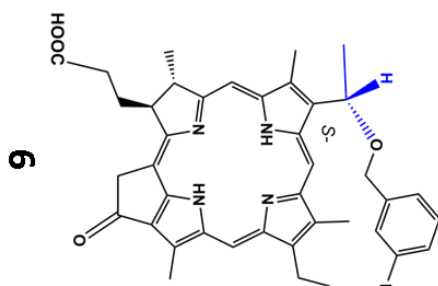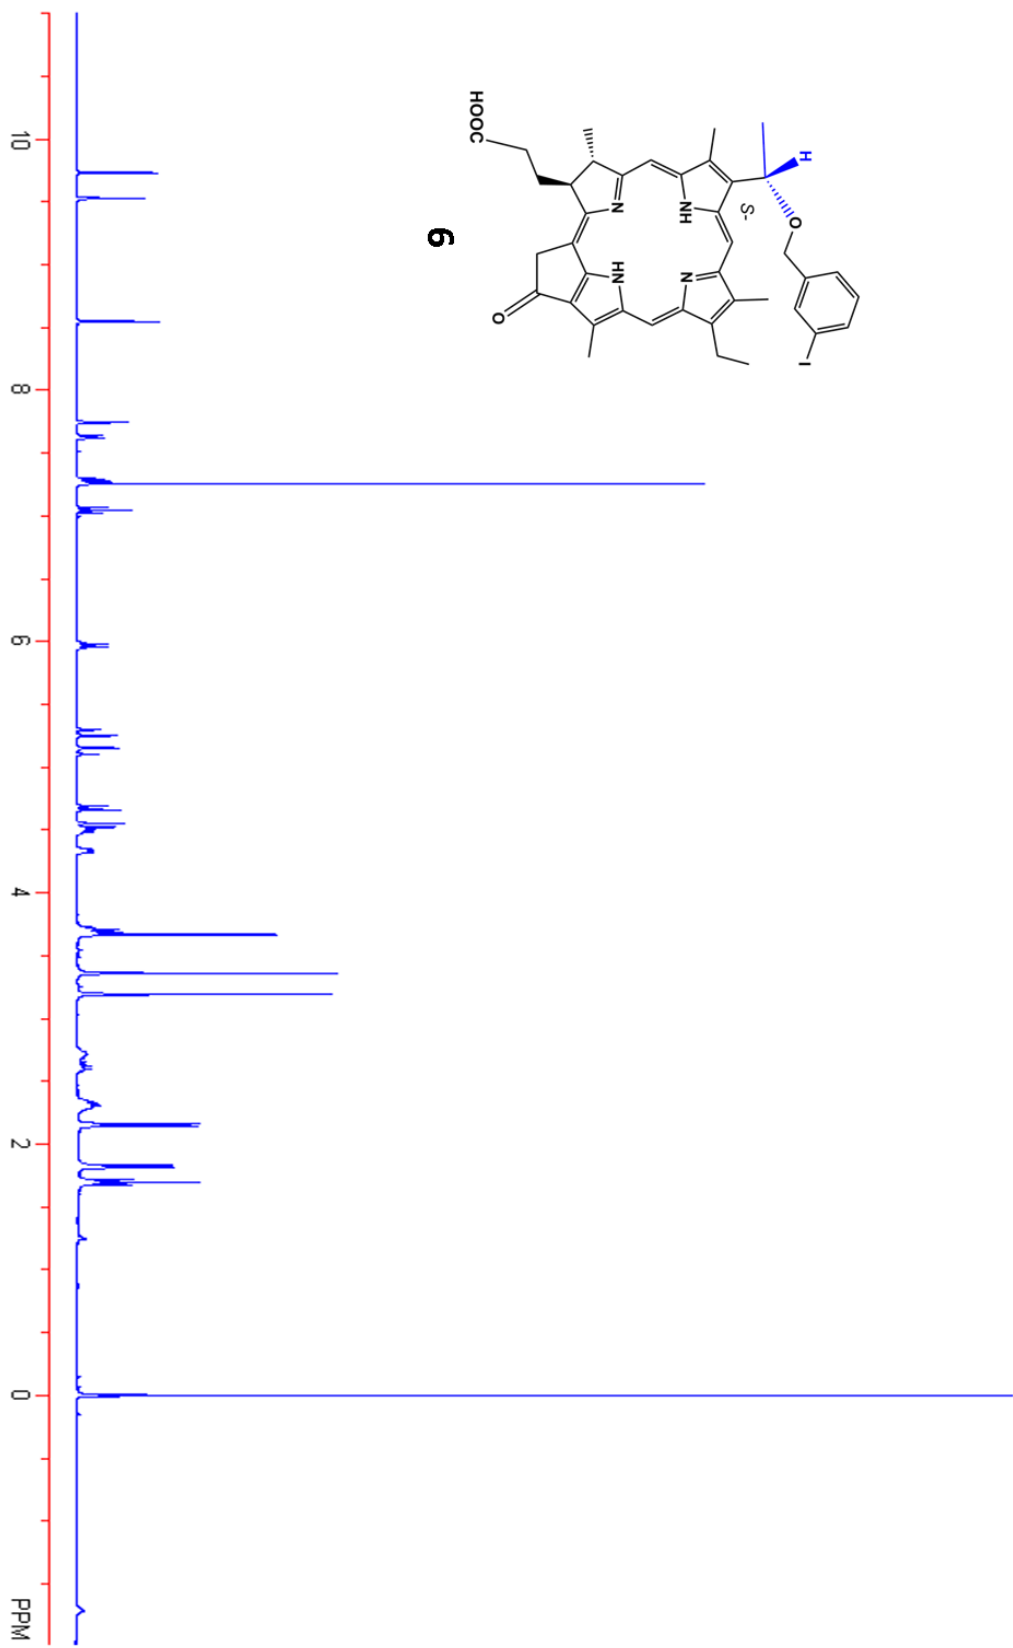

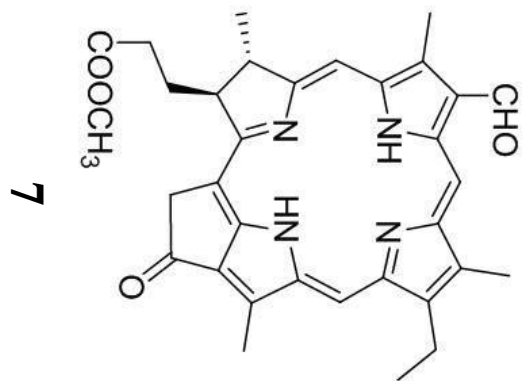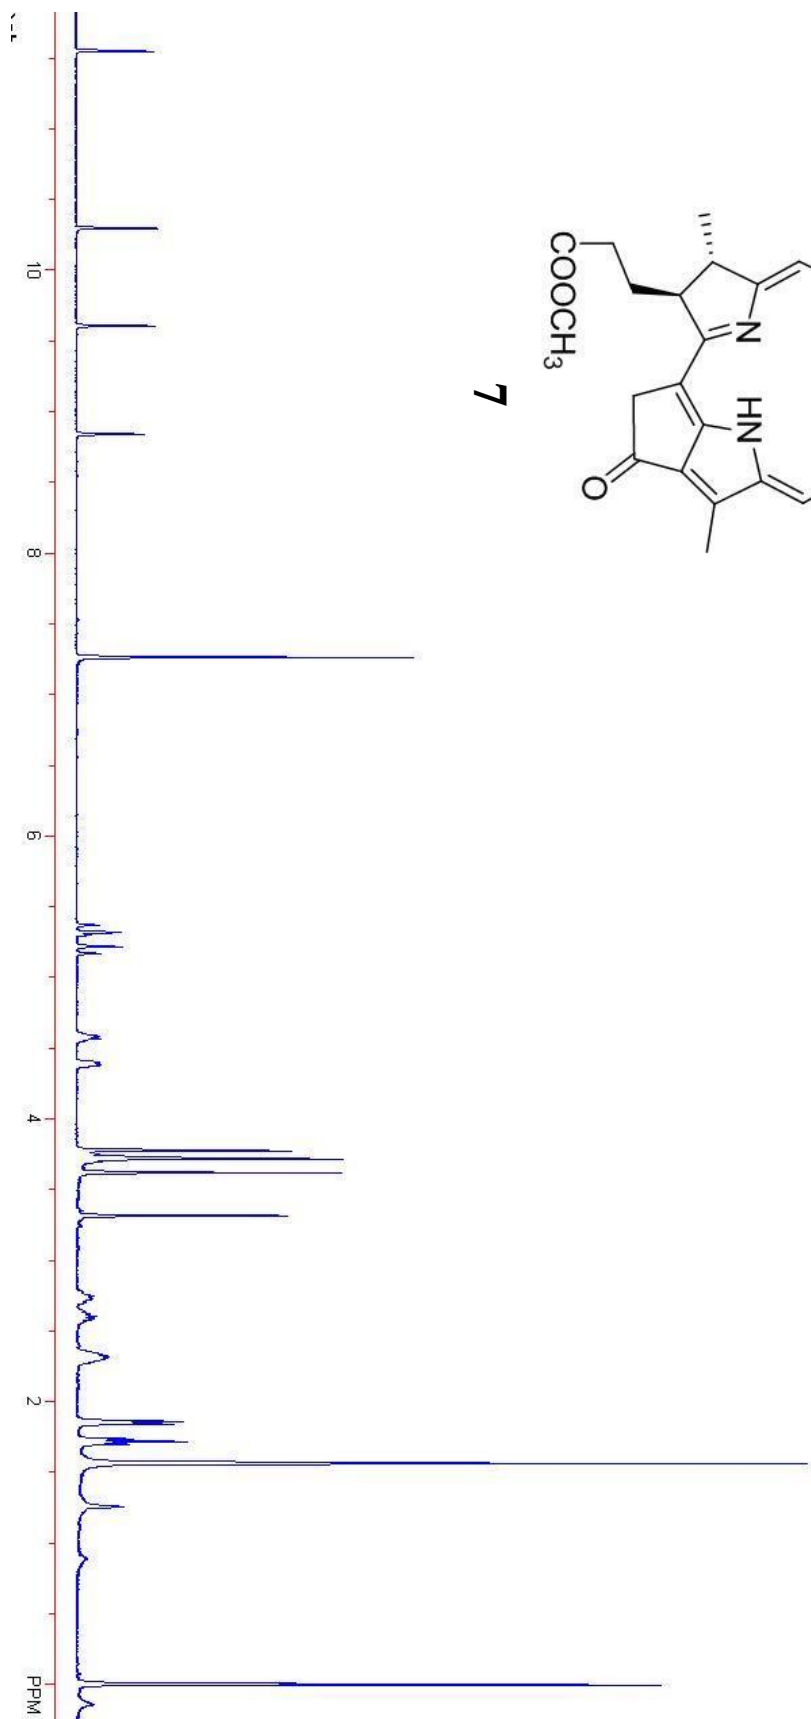

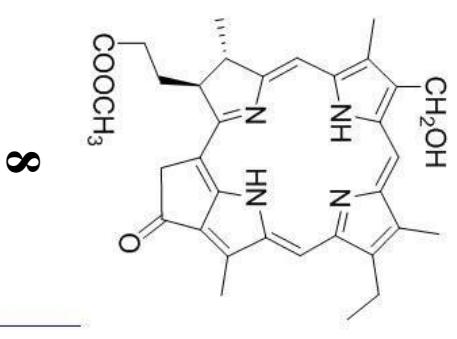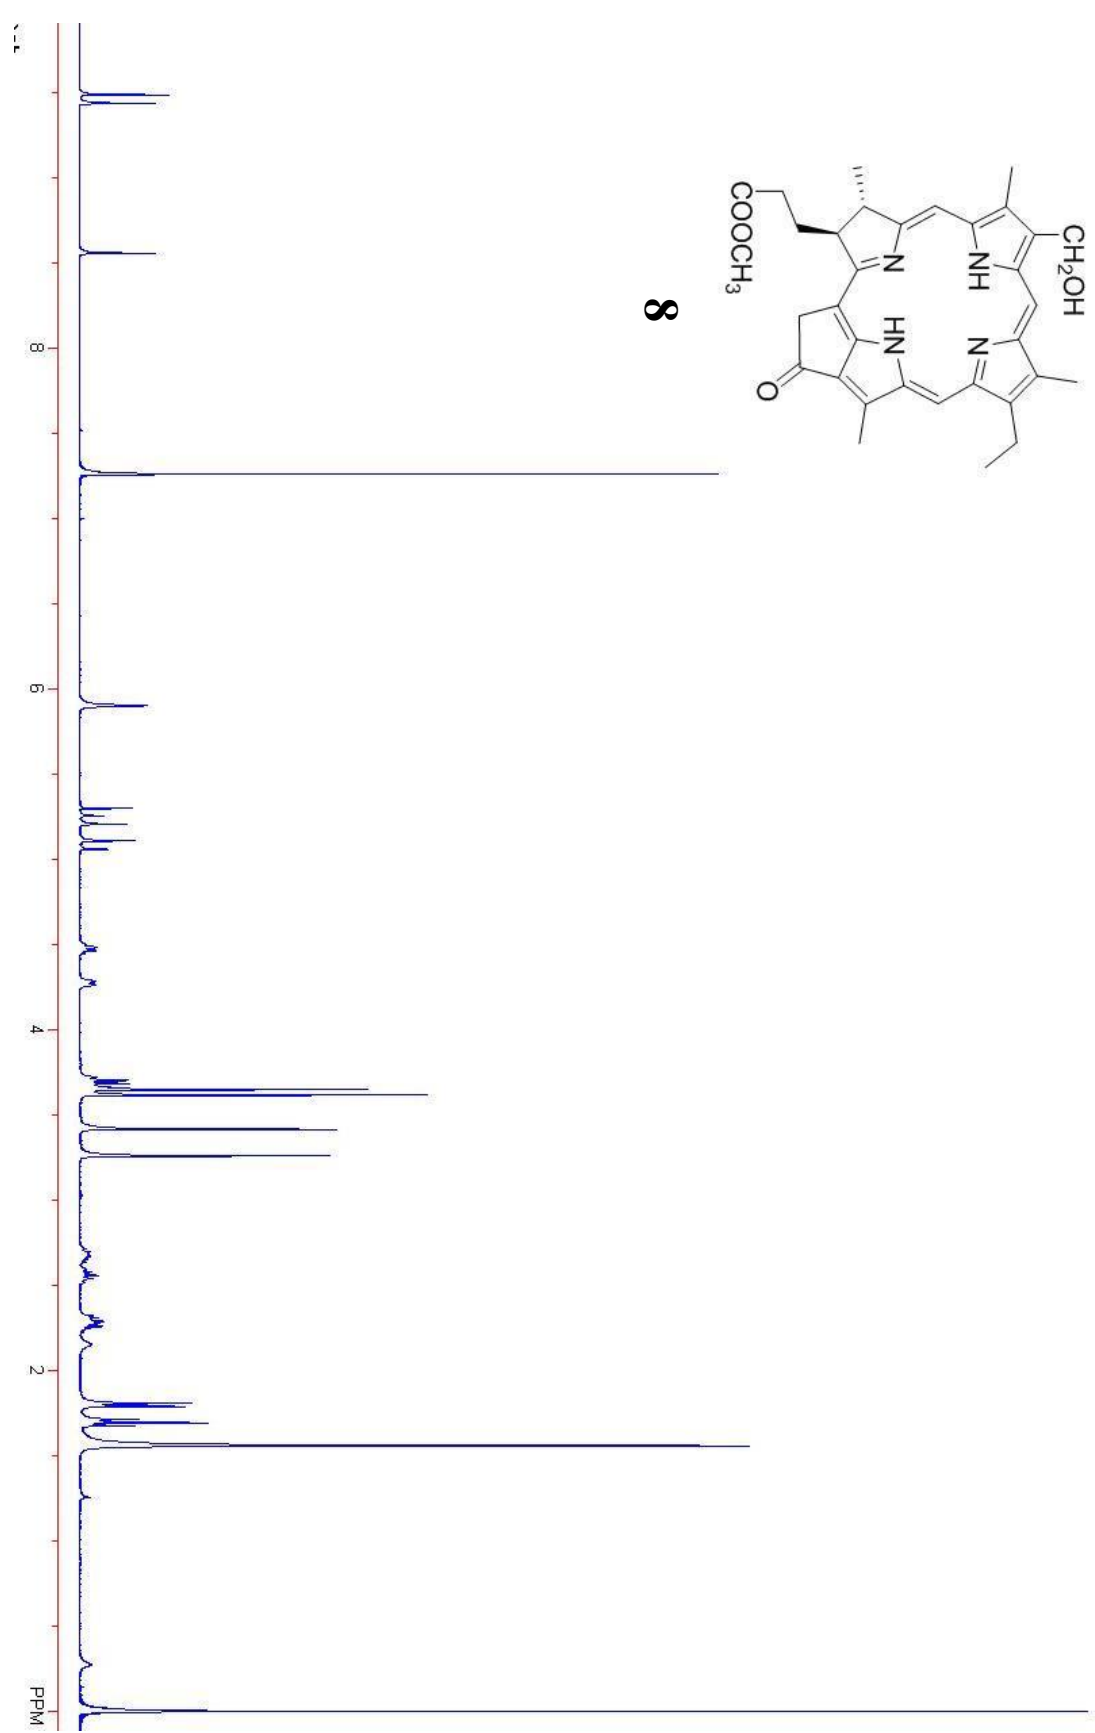

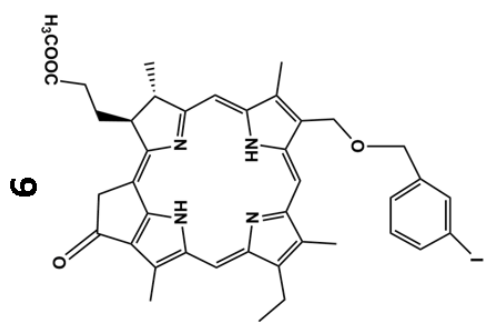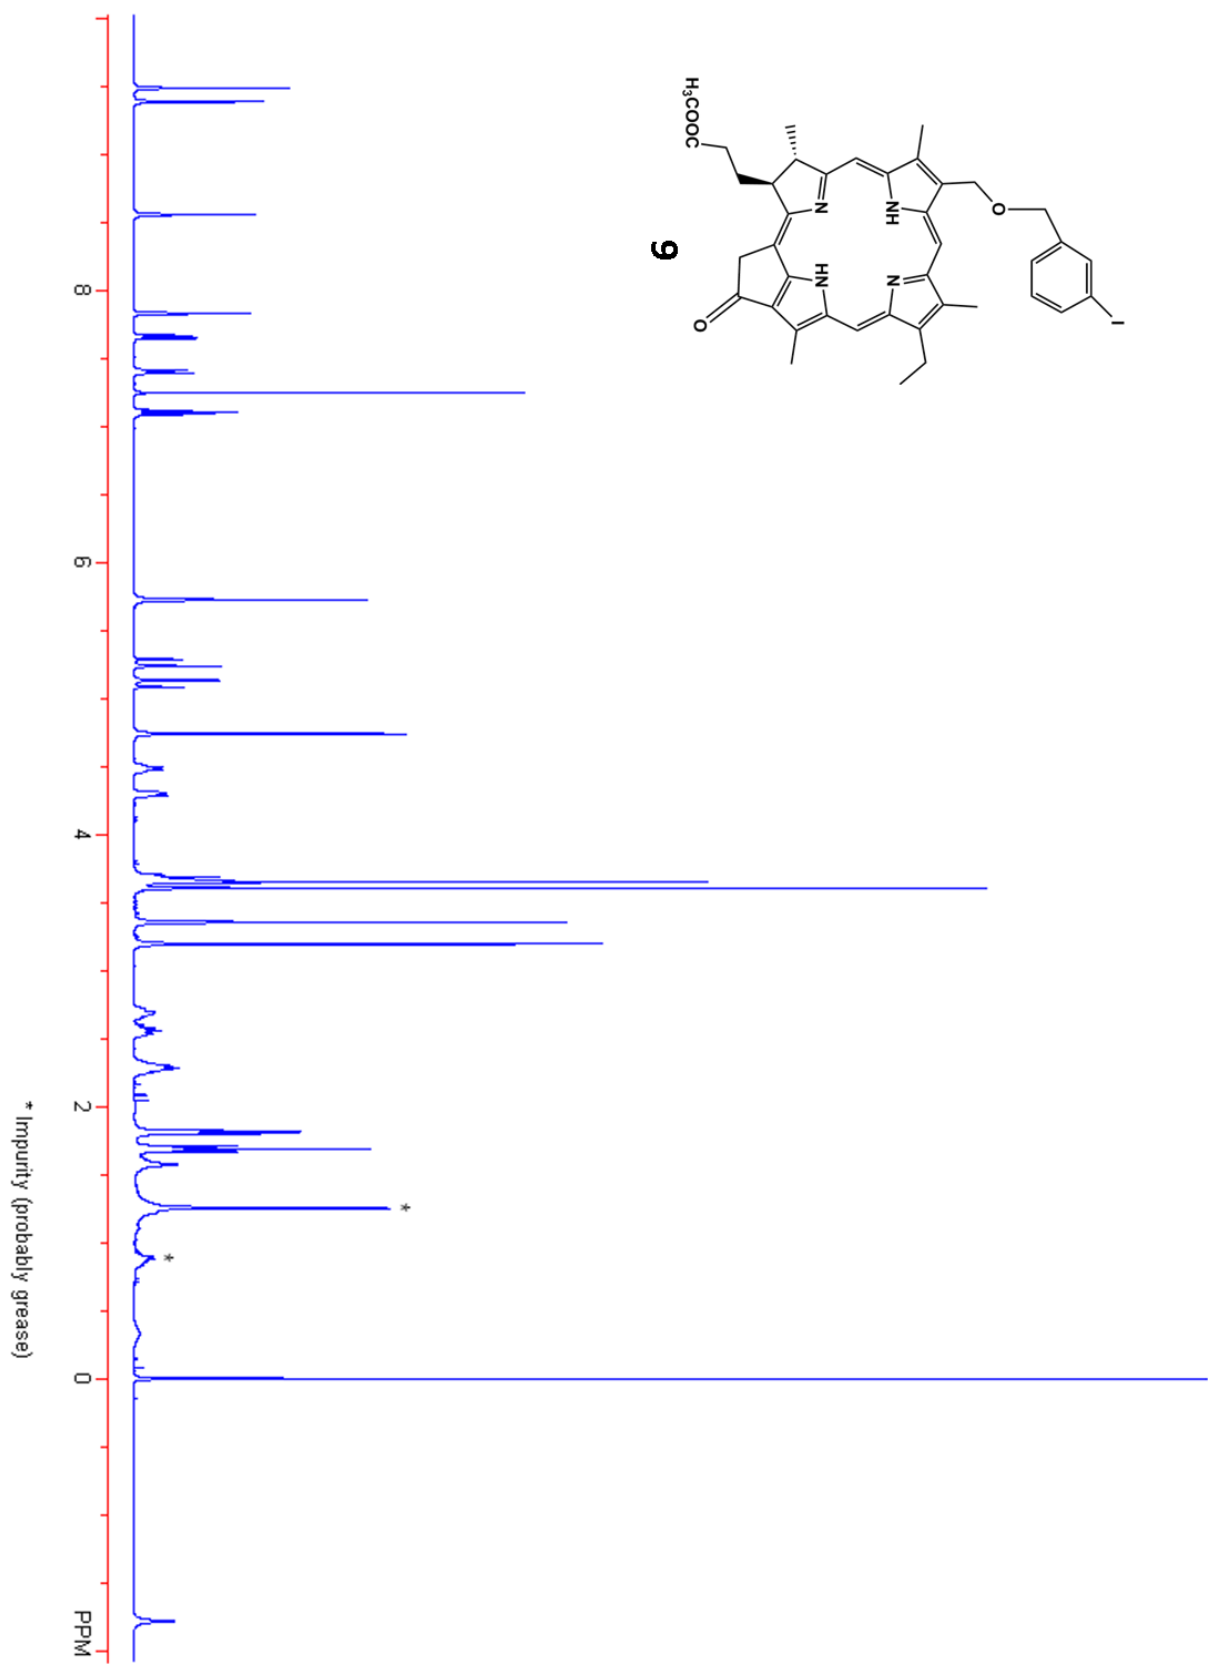



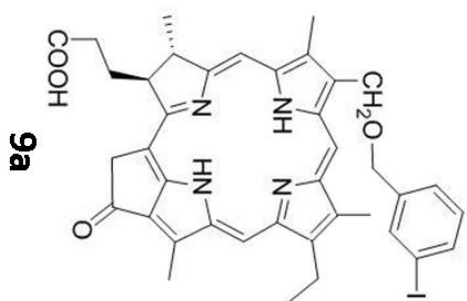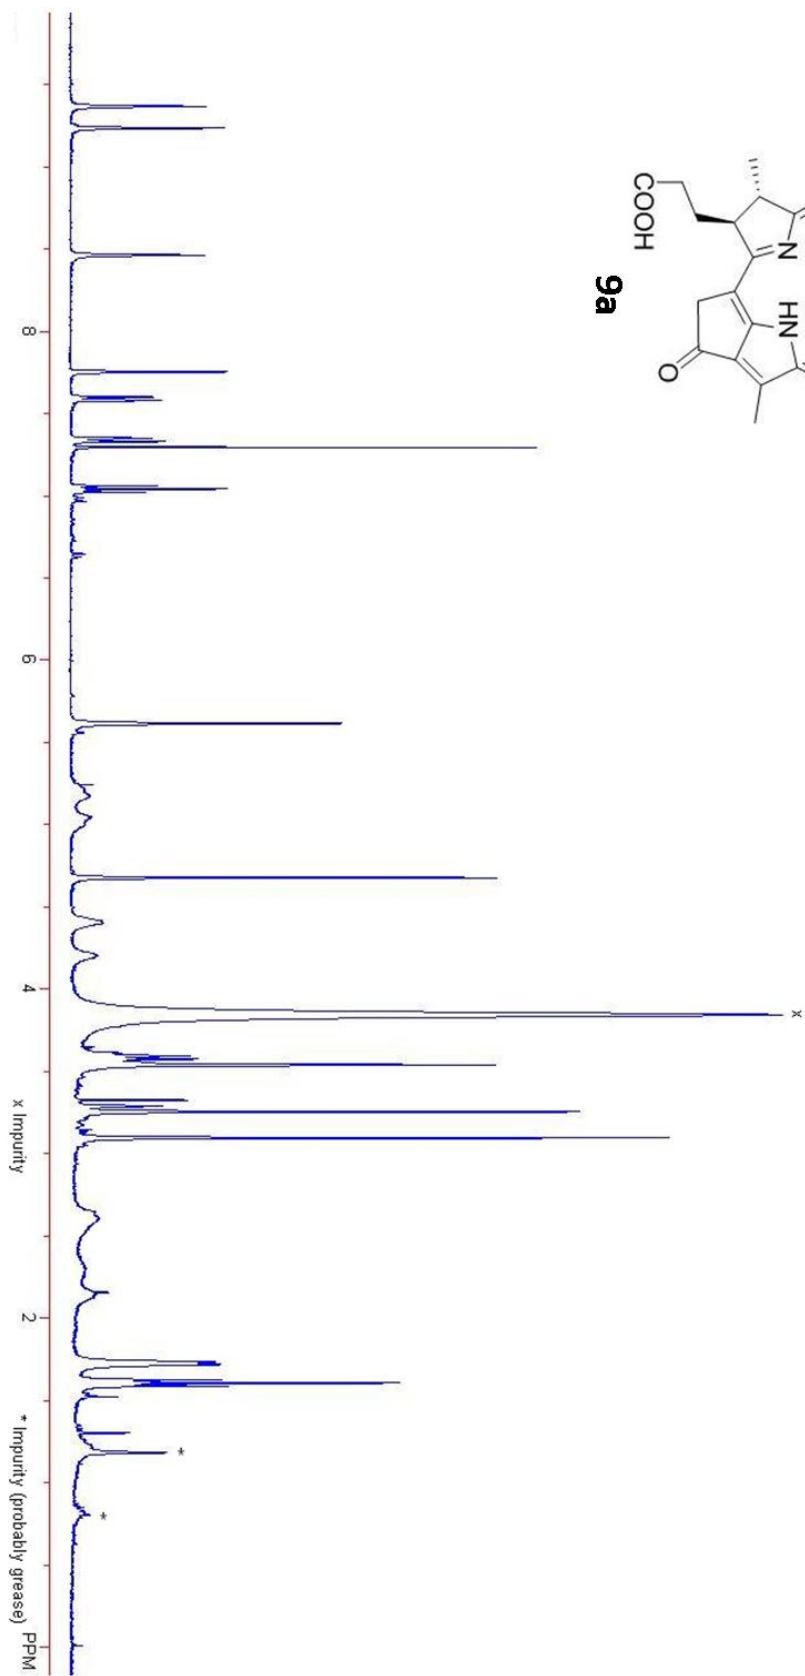

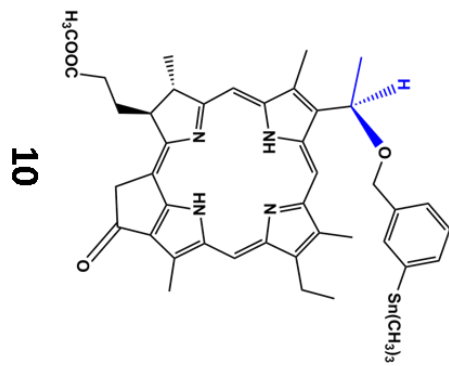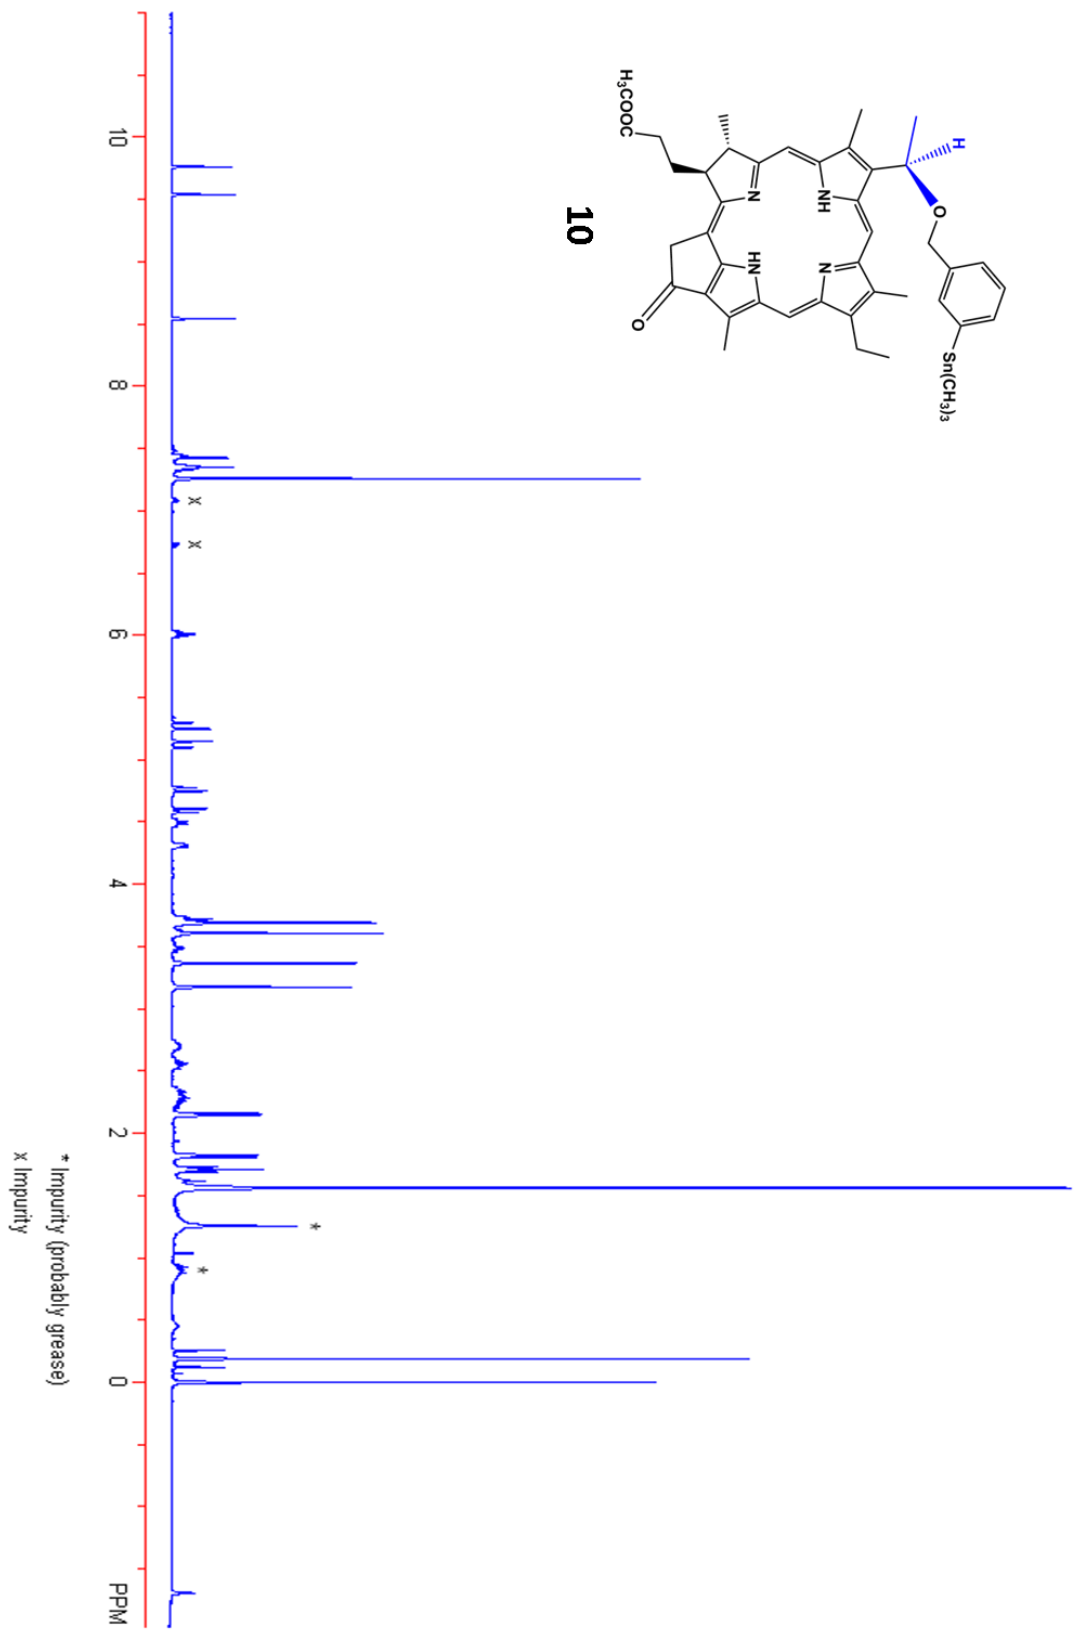

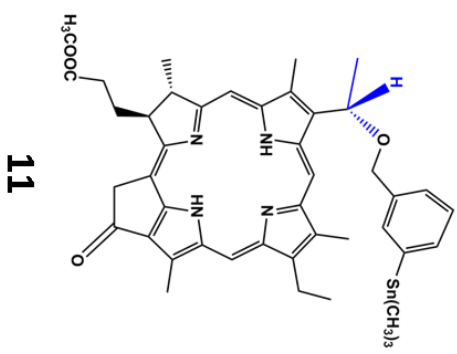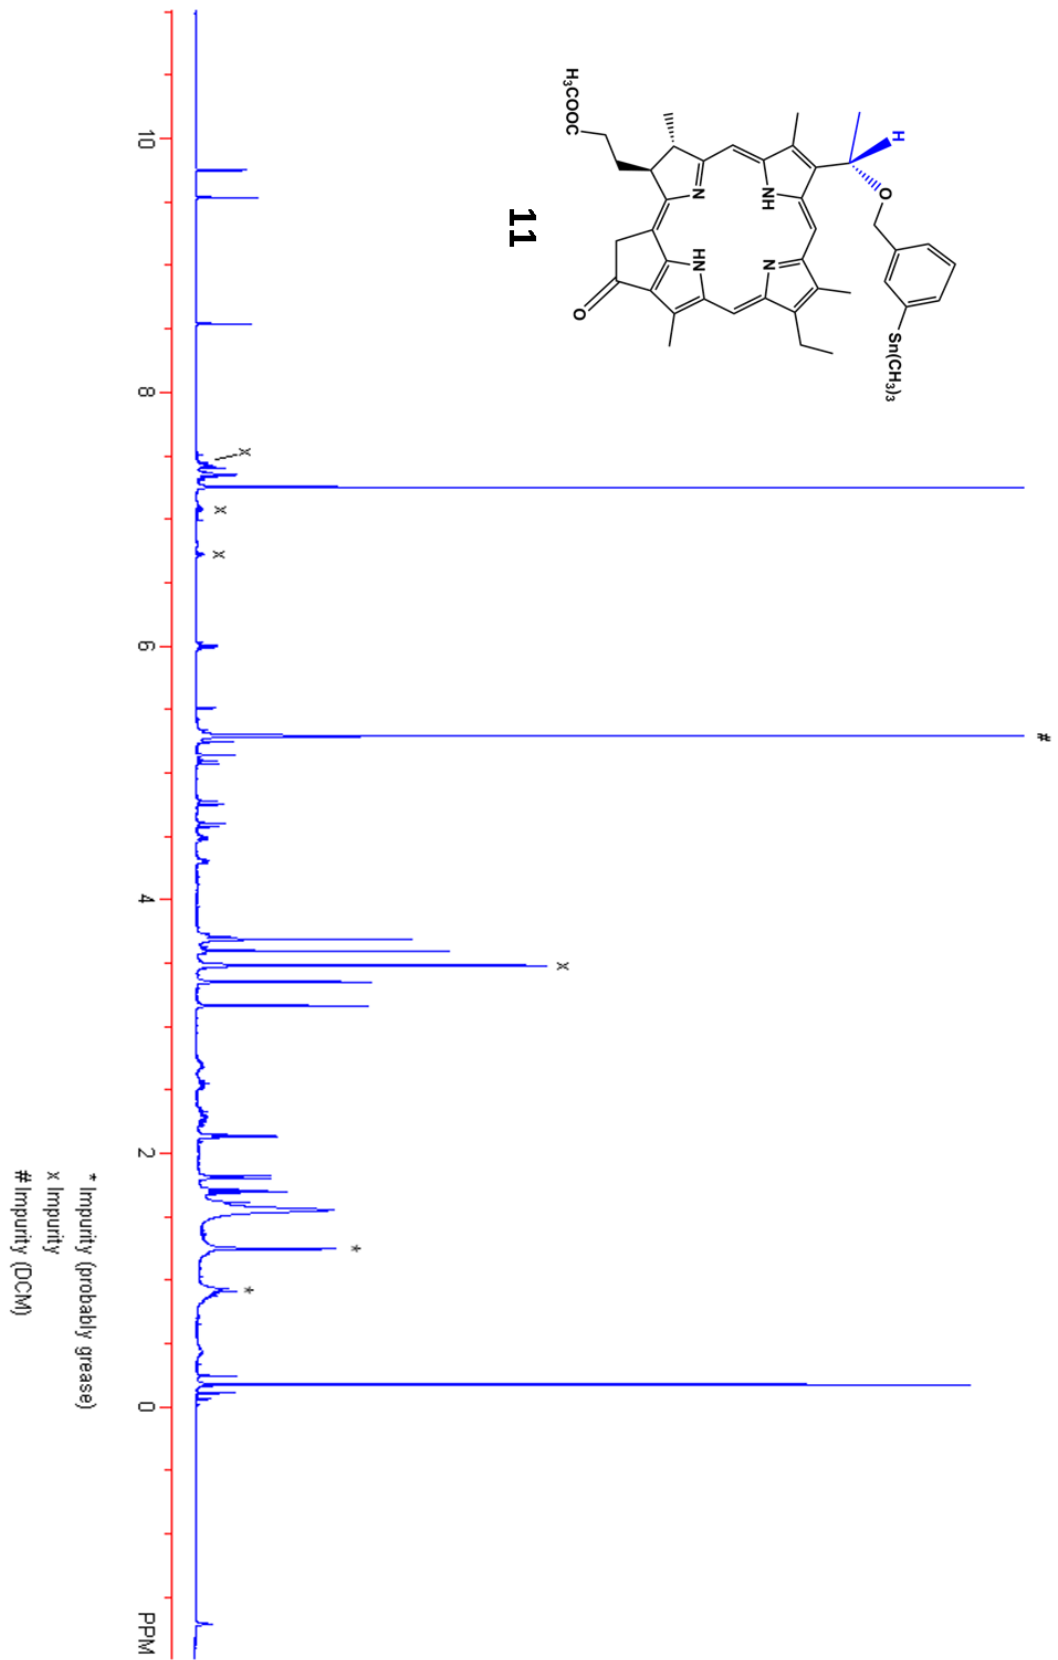

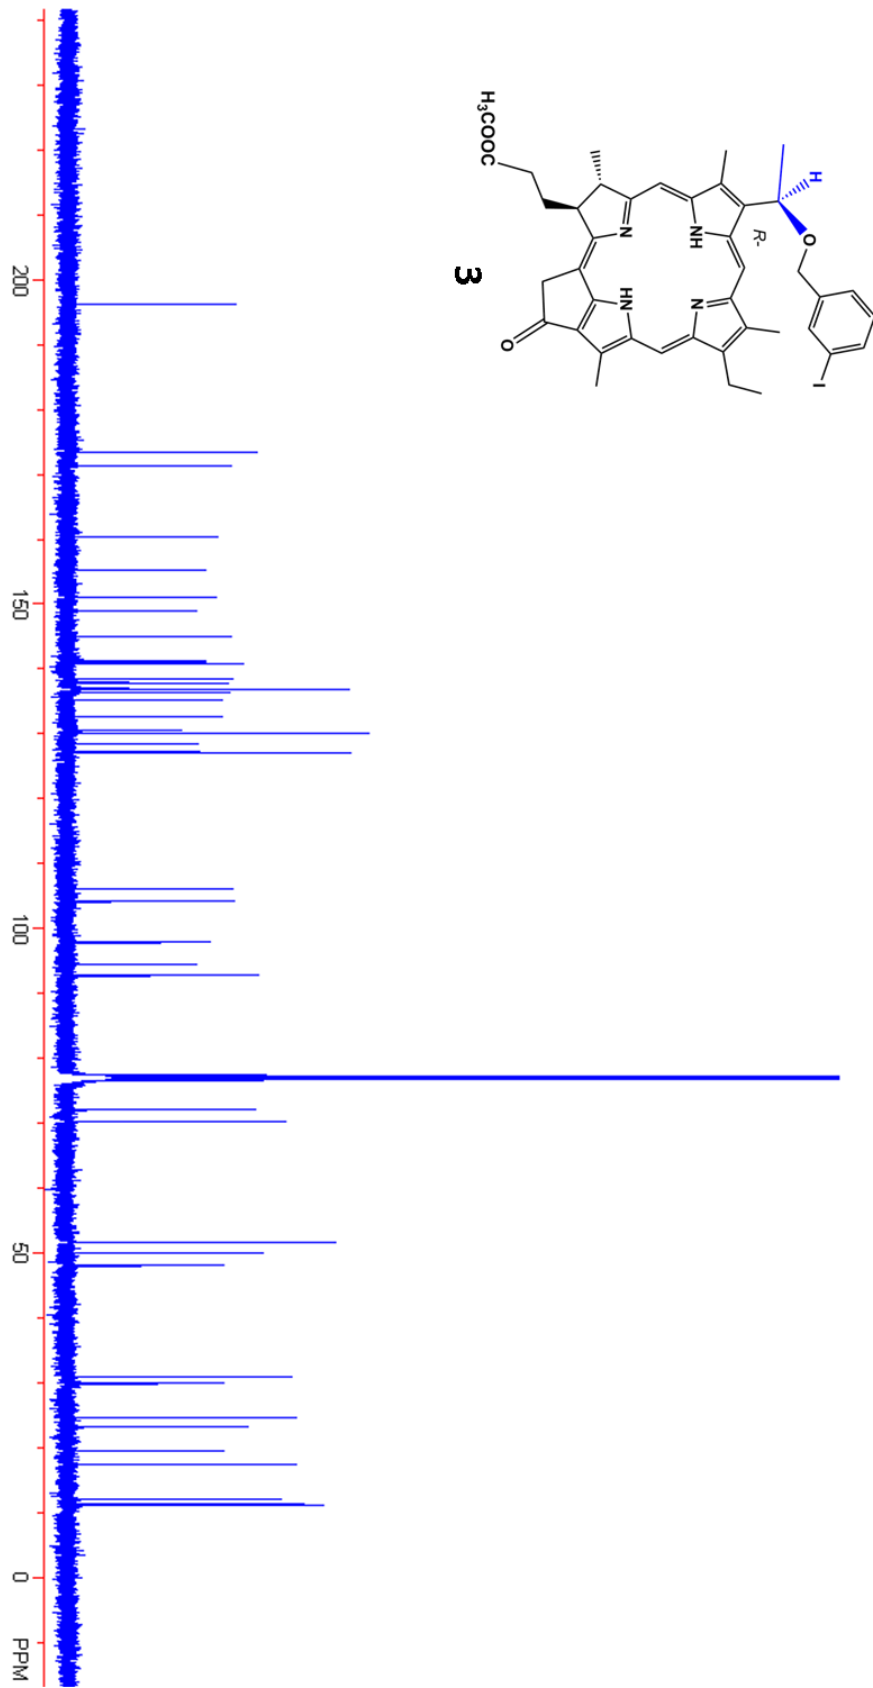

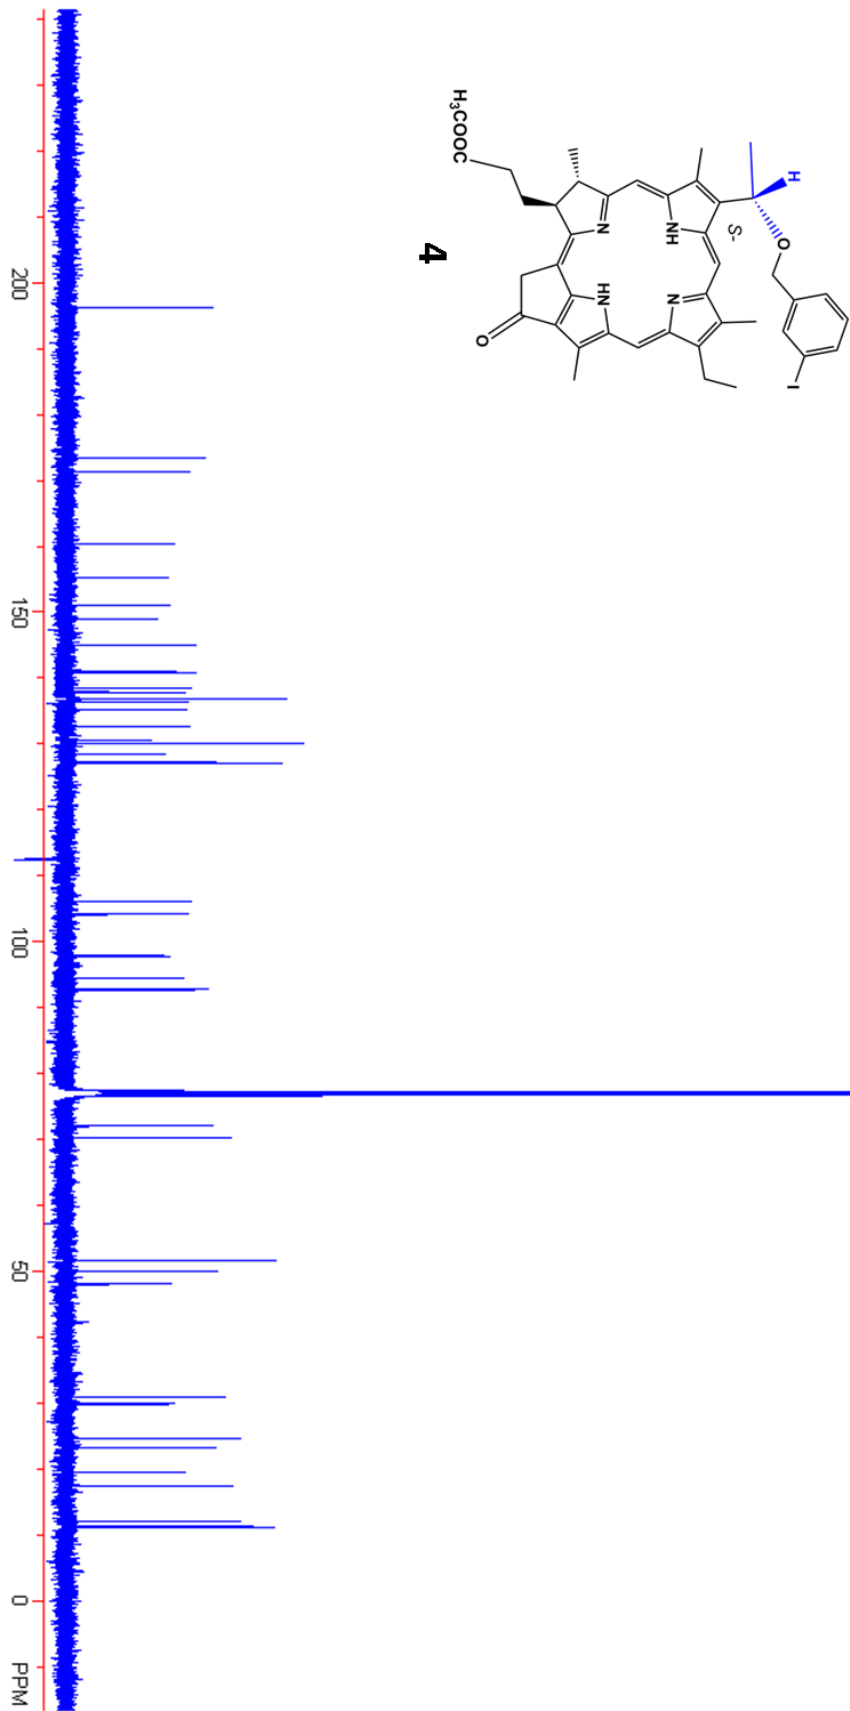

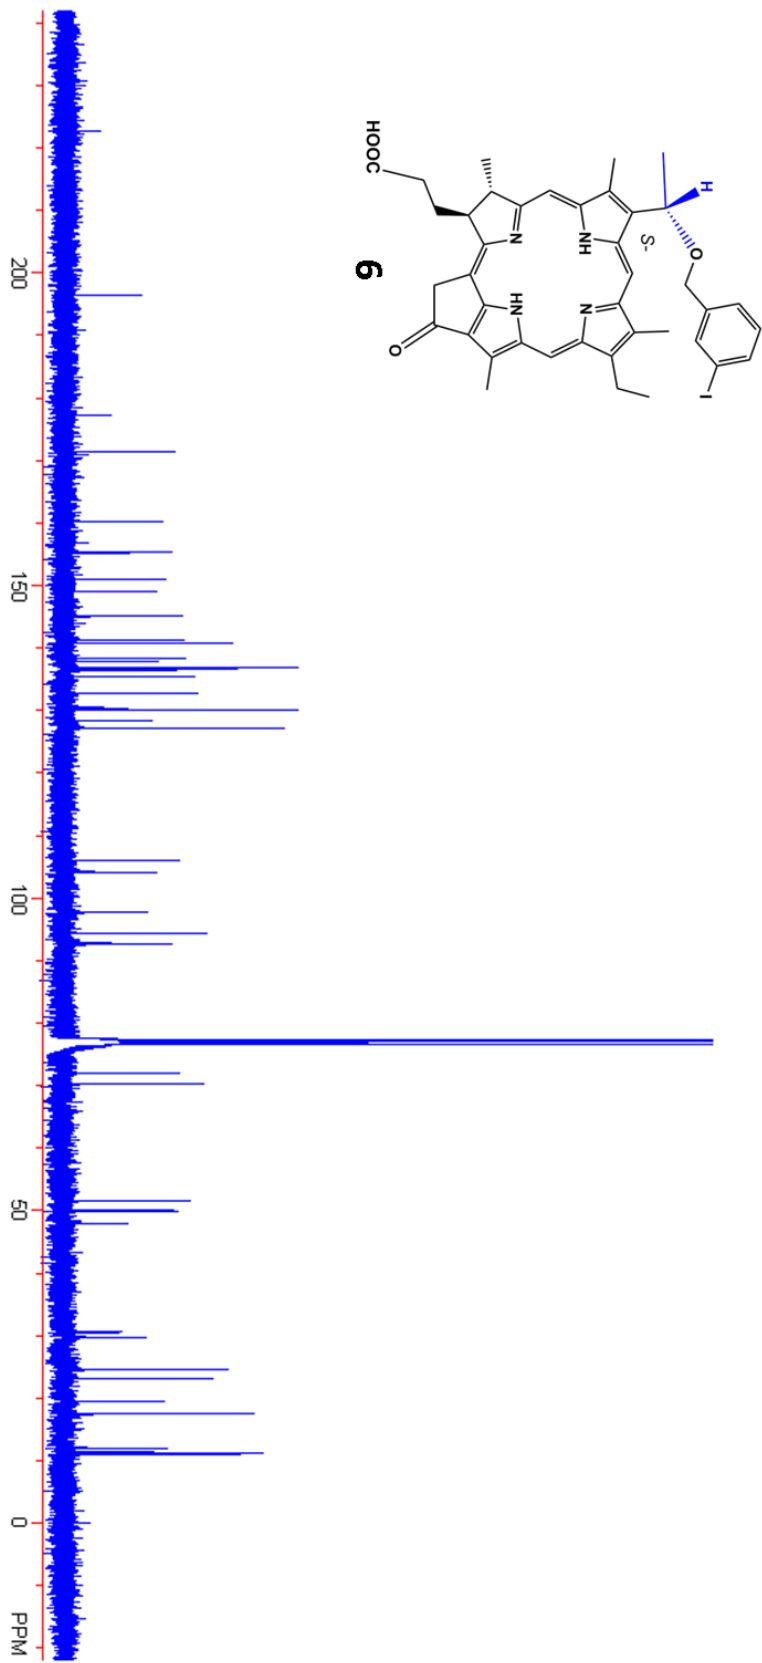

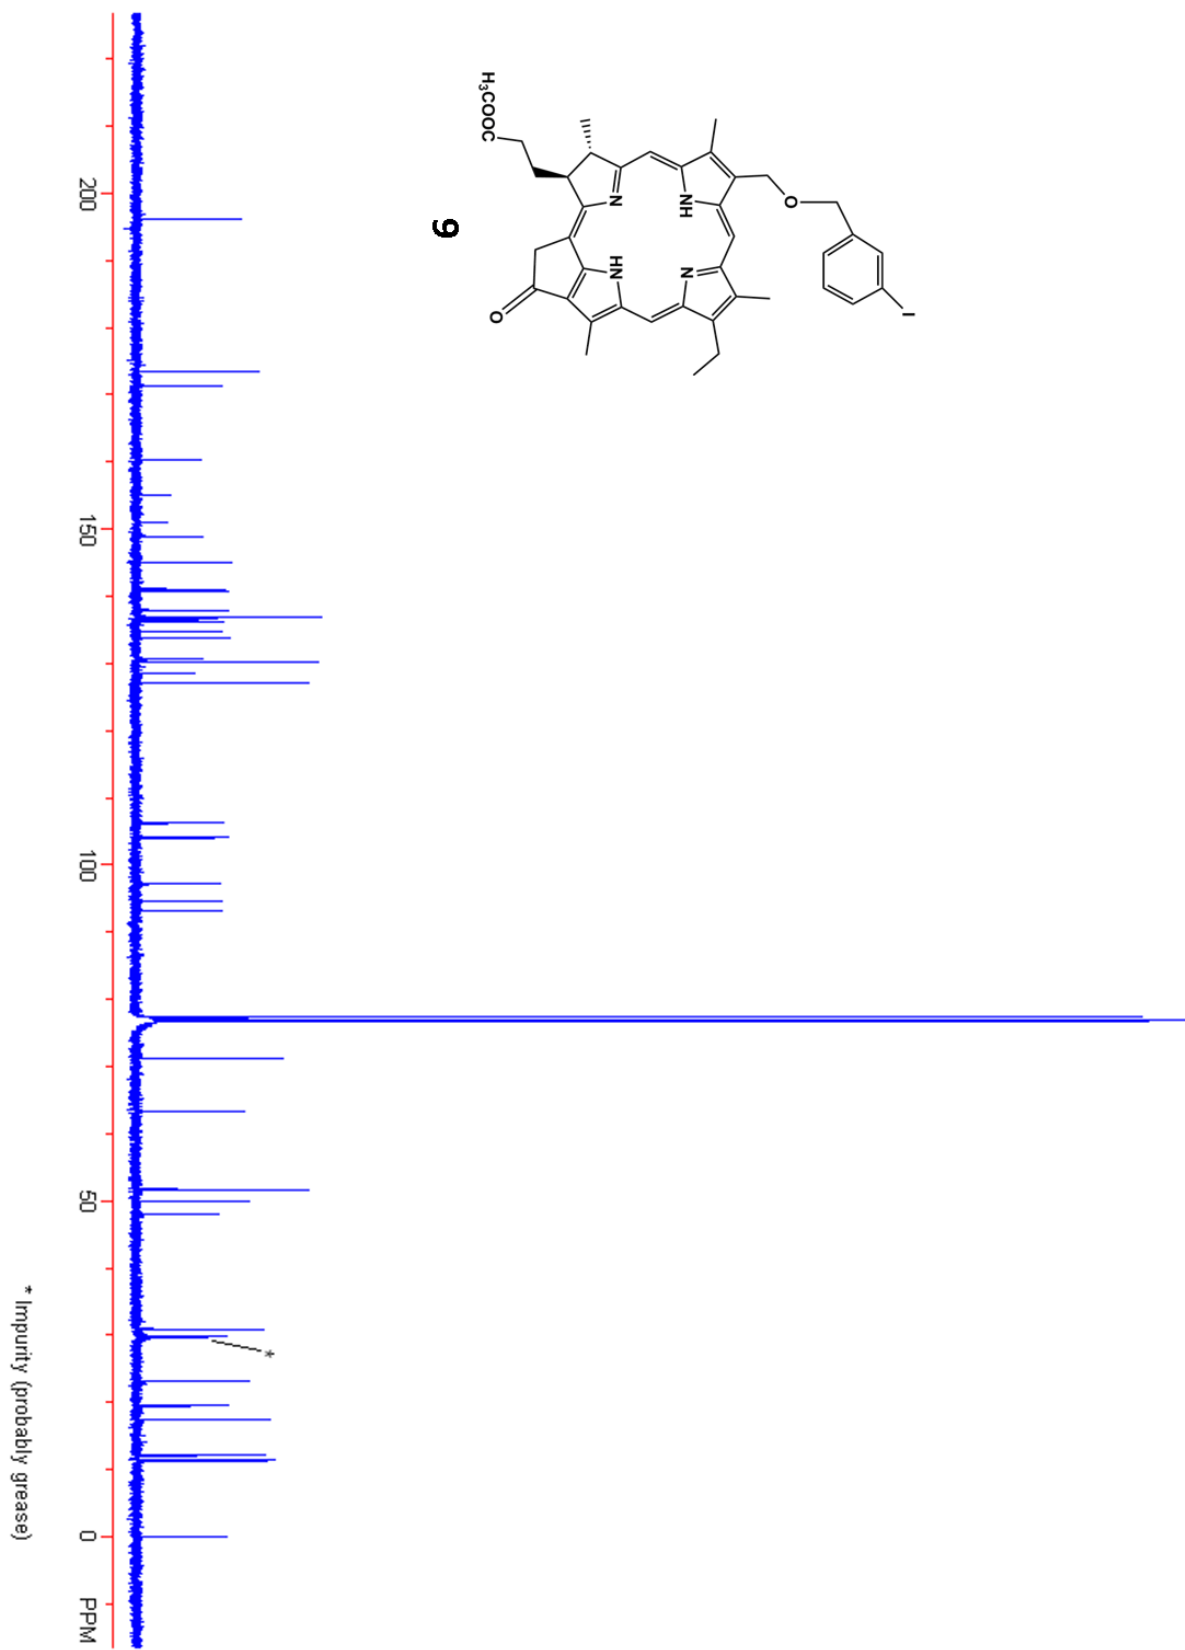





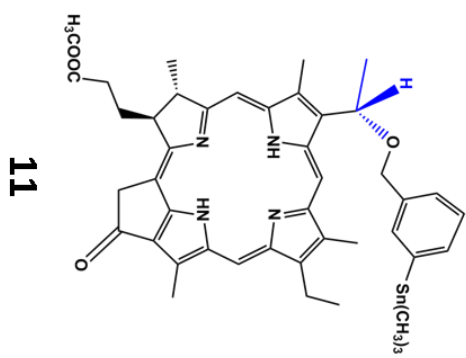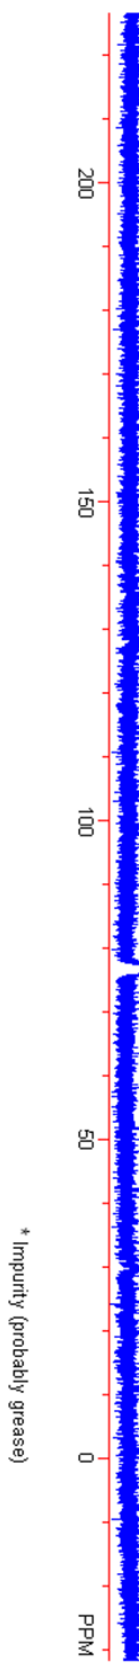

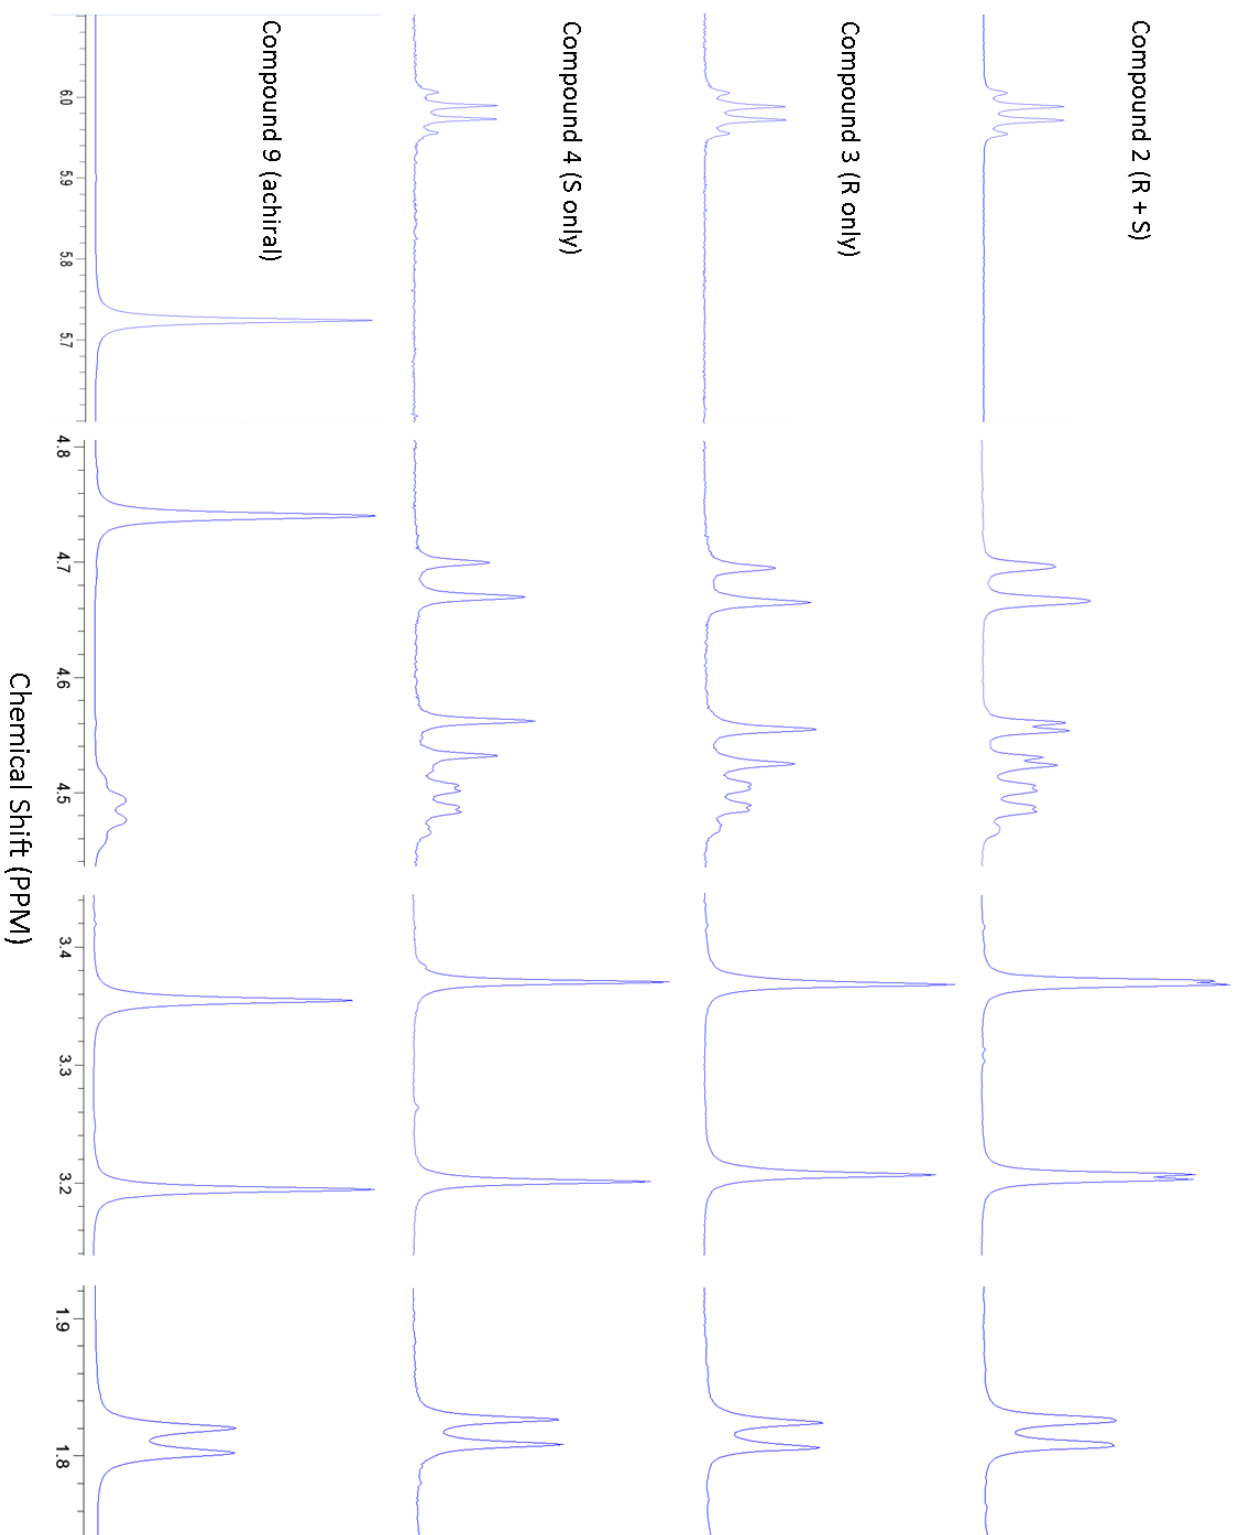

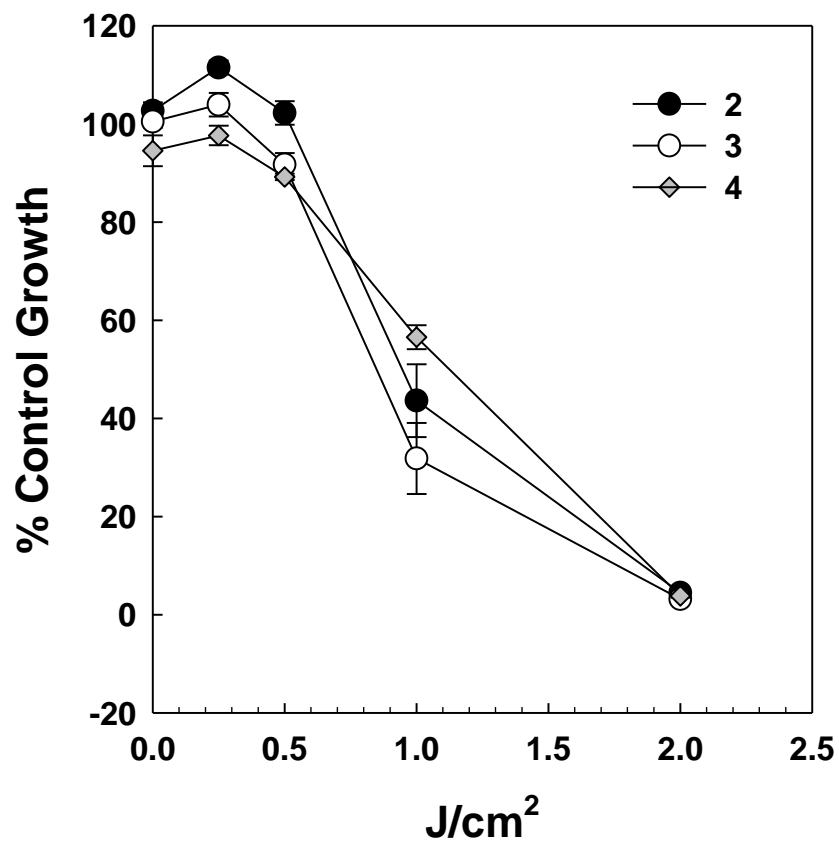

**Figure S19.** Growth inhibition of compounds **2-4** in colon 26 cells after 24 h incubation in medium containing 0.1  $\mu\text{M}$  compounds followed by irradiation at varying light doses. Following an additional 48 hr incubation, cell growth was determined using using a colorimetric assay that measures the reduction of yellow 3-(4,5-dimethylthiazol-2-yl)-2,5-diphenyl tetrazolium bromide (MTT) by mitochondrial succinate dehydrogenase. Data is representative of 2 separate experiments.
